# Supplementary material for: Regulatory T Cells Contribute to Sexual Dimorphism in Neonatal Hypoxic-Ischemic Brain Injury
Source: PubMed Central journal article supplement — Stroke. 2022 Jan 5;53(2):381–90. doi: 10.1161/STROKEAHA.121.037537 (PMC8785522; doi:10.1161/strokeaha.121.037537), 2022-01-05
Supplement: str-53-381-s004.pdf [file str-53-381-s004.pdf]

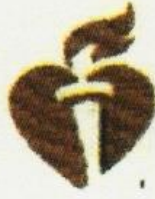

**American Stroke Association.**  
A division of the American Heart Association.

**Acknowledgment Permission Form**

Journal Stroke  
 Manuscript Number STROKE/2021/037537D  
 First Author Lucia Beckmann  
 Title of Work Regulatory T cells contribute to sexual dimorphism in neonatal hypoxic-ischemic brain injury

Authors must provide written permission/approval from all individuals mentioned by name in the Acknowledgments section of a submitted manuscript. By signing this form, any and all acknowledged persons therefore state that they have read and approved the mention of their names in the Acknowledgment section of the aforementioned paper.

| Name                             | Signature          | Date              |
|----------------------------------|--------------------|-------------------|
| Name (1) <u>Karina Kempe</u>     | <u>[Signature]</u> | <u>08/11/21</u>   |
| Name (2) <u>Mandana Rizazad</u>  | <u>[Signature]</u> | <u>03.11.21</u>   |
| Name (3) <u>Sina Lupus</u>       | <u>[Signature]</u> | <u>02/11/2021</u> |
| Name (4) <u>Witold Bartosik</u>  | <u>[Signature]</u> | <u>02/11/2021</u> |
| Name (5) <u>Sabine Senkel</u>    | <u>[Signature]</u> | <u>04/11/2021</u> |
| Name (6) <u>Adriane Hyla</u>     | <u>[Signature]</u> | <u>04.11.2021</u> |
| Name (7) <u>Michael Möllmann</u> | <u>[Signature]</u> | <u>05.11.21</u>   |
| Name (8) <u>Joachim Göthert</u>  | <u>[Signature]</u> | <u>05.11.21</u>   |
| Name (9) <u>Ralf Herrmann</u>    | <u>[Signature]</u> | <u>04.11.21</u>   |
| Name (10) <u>Tim Sparwasser</u>  | <u>[Signature]</u> | <u>06/11/21</u>   |
| Name (11)                        | Signature          | Date              |
| Name (12)                        | Signature          | Date              |
| Name (13)                        | Signature          | Date              |
| Name (14)                        | Signature          | Date              |
| Name (15)                        | Signature          | Date              |
| Name (16)                        | Signature          | Date              |
| Name (17)                        | Signature          | Date              |
| Name (18)                        | Signature          | Date              |
| Name (19)                        | Signature          | Date              |
| Name (20)                        | Signature          | Date              |
